# Supplementary material
Source: publisher site journal article supplement (https://www.dovepress.com/get_supplementary_file.php?f=427488.docx)
Supplement: Supplementary file 1 [file get_supplementary_file.php]

**Supplementary file 1.** Self-efficacy Based on Questionnaire Items

| **No Item** | **Items of Questionnaire** | **SE Logit** | **Model S.E Scores** | **Total Score** |
| --- | --- | --- | --- | --- |
| 12 | I can maintain an ideal body weight | 1.30 | 0.16 | 267 |
| 4 | I can drive safely after having a heart attack | 1.22 | 0.17 | 270 |
| 9 | I can handle it if I experience signs and symptoms of a heart attack after engaging in sexual activity | 1.11 | 0.17 | 274 |
| 7 | I can recognize when I can resume sexual activity | 0.84 | 0.18 | 283 |
| 8 | I am capable of knowing when to stop engaging in sexual activity | 0.81 | 0.18 | 284 |
| 26 | I can overcome the problems that can arise after taking the drug | 0.78 | 0.18 | 285 |
| 6 | I am confident that I can get back to work | 0.75 | 0.18 | 286 |
| 14 | I can reduce salt intake, such as reducing salt in cooking, avoiding the consumption of instant, canned, and light snacks | 0.65 | 0.18 | 289 |
| 25 | I can identify problems that can arise after taking the drug | 0.51 | 0.19 | 293 |
| 15 | I can limit the consumption of added sugars like those found in packaged foods and drinks | 0.40 | 0.19 | 296 |
| 5 | I am confident that I can safely engage in gradual physical activity | 0.25 | 0.20 | 300 |
| 18 | I can avoid the source of stress | 0.25 | 0.20 | 300 |
| 13 | I can afford to avoid consuming high-fat foods such as red meat, lard, chicken skin, and offal | 0.17 | 0.20 | 302 |
| 2 | I can control myself and stay calm when I have a heart attack | 0.09 | 0.20 | 304 |
| 17 | I can identify my sources of stress | 0.05 | 0.20 | 305 |
| 1 | I am capable of recognizing the signs and symptoms of a heart attack | -0.03 | 0.20 | 307 |
| 3 | I can take heart attack medication when I have a heart attack | -0.07 | 0.20 | 308 |
| 11 | I can change my fat consumption by choosing fats that are better for my health, such as fish, avocados, and nuts | -0.37 | 0.21 | 315 |
| 20 | I can share grievances with someone or something | -0.41 | 0.21 | 316 |
| 10 | I can increase fruit and vegetable consumption | -0.63 | 0.21 | 321 |
| 21 | I can talk about positive things about myself | -0.63 | 0.21 | 321 |
| 23 | I can see the positive side of my misfortune | -0.67 | 0.21 | 322 |
| 22 | I can become a more grateful person and able to enjoy life | -0.93 | 0.21 | 328 |
| 24 | I can understand the consumption of drugs according to the doctor's prescription by not skipping taking the medication even though I need to take medication for a long time | -1.19 | 0.21 | 334 |
| 19 | I can calm myself by remembering God as my source of strength or other positive things that can make me more relaxed | -1.69 | 0.21 | 346 |
| 16 | I can quit smoking | -2.56 | 0.21 | 367 |

**Abbreviations**: SE, Self-Efficacy; S.E, Standard Error.
